# Supplementary material for: Reformulation of Processed Yogurt and Breakfast Cereals over Time: A Scoping Review
Source: Int J Environ Res Public Health. 2023 Feb 14;20(4):3322. doi: 10.3390/ijerph20043322 (PMC9964677; doi:10.3390/ijerph20043322)
Supplement: Supplementary file 1 [file ijerph-20-03322-s001.zip › Supplementary Table S1_January 2023.pdf]

**Supplementary Table S1. Average nutrition information as declared in the review eligible study.**

| Lead Author     | Year of Publication | Reporting method          | Food category    | Time Point 1 | Number of products | Energy per 100g |           |       |          | Fat per 100g |          | Saturated Fat per 100g |          | Sugar p |
|-----------------|---------------------|---------------------------|------------------|--------------|--------------------|-----------------|-----------|-------|----------|--------------|----------|------------------------|----------|---------|
|                 |                     |                           |                  |              |                    | kJ              | Variance  | Kcal  | Variance | g            | Variance | g                      | Variance |         |
| Walker et al.   | 2010                | Median (IQR)              | Yogurt           | 2005         | 169                | 385             | 140       |       |          | 1            | 3        | 0.6                    | 2        | 13.7    |
| Louie et al.    | 2012                | Mean (Standard Error)     | Breakfast cereal | 2004         | 67                 | 1532.7          | 18.9      |       |          | 4.6          | 0.5      | 1.3                    | 0.2      | 16      |
| Trevena et al.  | 2014                | Mean (Standard Deviation) | Breakfast cereal | 2010         | 125                |                 |           |       |          |              |          |                        |          |         |
| He et al.       | 2014                | Mean (Standard Deviation) | Breakfast cereal | 2004         | 306                |                 |           |       |          |              |          |                        |          |         |
| Monro et al.    | 2015                | Mean (Standard Deviation) | Breakfast cereal | 2003         | 109                |                 |           |       |          |              |          |                        |          |         |
| Arcand et al.   | 2016                | Mean (Standard Deviation) | Breakfast cereal | 2010         | 230                |                 |           |       |          |              |          |                        |          |         |
| Zganiacz et al. | 2017                | Mean (Standard Deviation) | Breakfast cereal | 1980         | 10                 |                 |           |       |          |              |          |                        |          |         |
| Chepulis et al. | 2017                | Mean (Standard Deviation) | Breakfast Cereal | 2013         | 247                | 1582.1          | 153.4     |       |          | 5.7          | 5        | 1.3                    | 1.4      | 17.5    |
| Kanter et al.   | 2019                | Median (min-max)          | Breakfast cereal | 2015         | 93                 |                 |           | 380   | 362-403  |              |          | 2.8                    | 1.2-4.6  | 24      |
|                 |                     |                           | Yogurt (normal)  | 2015         | 38                 |                 |           | 90    | 78-93    |              |          |                        |          | 13.7    |
| Moore et al.    | 2020                | Median (min-max)          | Yogurt           | 2016         | 898                |                 |           |       |          |              |          |                        |          | 11.9    |
| Vermote et al.  | 2020                | Mean (Standard Error)     | Breakfast cereal | 2017         | 320                |                 |           | 401.6 | 2        | 8.5          | 0.3      | 2.5                    | 0.1      | 20.1    |
| McMenemy et al. | 2020                | Mean (Standard Deviation) | Breakfast cereal | 2014         | 86                 | 1639.17         | 145.2     | 387.2 | 36.91    | 6.15         | 6.49     | 1.63                   | 1.91     | 17.06   |
| Croisier et al. | 2021                | Median (min-max)          | Breakfast cereal | 2013         | 134                | 1590            | 1530-1630 |       |          | 3.4          | 1.6-8.4  | 0.9                    | 0.4-1.5  | 17.3    |

|          |      |               |       |                 | Time<br>Point 2 | Number<br>of<br>products |                 |           |       |          |              |          |                        |          |                |          |               |          |                 |          |
|----------|------|---------------|-------|-----------------|-----------------|--------------------------|-----------------|-----------|-------|----------|--------------|----------|------------------------|----------|----------------|----------|---------------|----------|-----------------|----------|
| er 100g  |      | Salt per 100g |       | Sodium per 100g |                 |                          | Energy per 100g |           |       |          | Fat per 100g |          | Saturated Fat per 100g |          | Sugar per 100g |          | Salt per 100g |          | Sodium per 100g |          |
| Variance | g    | Variance      | mg    | Variance        |                 |                          | kJ              | Variance  | Kcal  | Variance | g            | Variance | g                      | Variance | g              | Variance | g             | Variance | mg              | Variance |
| 6.7      |      |               | 59    | 23              | 2008            | 90                       | 418             | 151       |       |          | 2.6          | 2        | 1.6                    | 2        | 13.9           | 5        |               |          | 58              | 21       |
| 1.4      |      |               | 209   | 29.7            | 2010            | 67                       | 1552.3          | 14.9      |       |          | 4.4          | 0.5      | 1                      | 0.1      | 16.2           | 1.4      |               |          | 210.3           | 28.6     |
|          |      |               | 316   | NA              | 2013            | 159                      |                 |           |       |          |              |          |                        |          |                |          |               |          | 237             | NA       |
|          | 0.95 | 0.74          |       |                 | 2011            | 290                      |                 |           |       |          |              |          |                        |          |                |          | 0.41          | 0.39     |                 |          |
|          |      |               | 348   | 275             | 2013            | 176                      |                 |           |       |          |              |          |                        |          |                |          |               |          | 215             | 183      |
|          |      |               | 375   | 246             | 2013            | 250                      |                 |           |       |          |              |          |                        |          |                |          |               |          | 301             | 242      |
|          |      |               | 806   | NA              | 2013            | 10                       |                 |           |       |          |              |          |                        |          |                |          |               |          | 400             | NA       |
| 10       |      |               | 193.3 | 187.9           | 2017            | 243                      | 1665.2          | 194.2     |       |          | 9.2          | 9.8      | 2                      | 2.3      | 17             | 9.7      |               |          | 171.6           | 161.3    |
| 16.5-30  |      |               | 192   | 81-320          | 2016            | 93                       |                 |           | 380   | 362-403  |              |          | 2.8                    | 1.2-4.5  | 24             | 16.5-30  |               |          | 188             | 81-290   |
| 8.2-14.5 |      |               |       |                 | 2016            | 38                       |                 |           | 90    | 65-97    |              |          |                        |          | 11.1           | 8.2-13.1 |               |          |                 |          |
| 8.8,13.6 |      |               |       |                 | 2019            | 893                      |                 |           |       |          |              |          |                        |          | 10.4           | 6.6,13   |               |          |                 |          |
| 0.5      | 0.5  | 0             |       |                 | 2018            | 330                      |                 |           | 404.7 | 2        | 9.1          | 0.4      | 2.4                    | 0.1      | 18.3           | 0.5      | 0.4           | 0        |                 |          |
| 9.98     | 0.6  | 0.36          |       |                 | 2017            | 86                       | 1629.34         | 132.28    | 385.9 | 32.3     | 5.92         | 6        | 1.51                   | 1.79     | 16.1           | 9.62     | 0.56          | 0.34     |                 |          |
| 7.9-24.8 |      |               | 167.5 | 23-355          | 2020            | 134                      | 1600            | 1540-1640 |       |          | 4.35         | 1.8-8.8  | 1                      | 0.5-1.6  | 15             | 7.1-22.3 |               |          | 169.5           | 16-300   |
