# Supplementary material for: Reformulation of Processed Yogurt and Breakfast Cereals over Time: A Scoping Review
Source: Int J Environ Res Public Health. 2023 Feb 14;20(4):3322. doi: 10.3390/ijerph20043322 (PMC9964677; doi:10.3390/ijerph20043322)
Supplement: Supplementary file 1 [file ijerph-20-03322-s001.zip › Supplementary Table S2_January 2023.pdf]

| Published Year | Title                                                                                                                                                                                           | Reason for Exclusion                                         |
|----------------|-------------------------------------------------------------------------------------------------------------------------------------------------------------------------------------------------|--------------------------------------------------------------|
| 2021           | The sugar content of foods in the UK by category and company: A repeated cross-sectional study, 2015-2018                                                                                       | Nutrient of interest no report                               |
| 2020           | Trends in Free Sugar Content of Slovenian Pre-Packaged Foods and Non-Alcoholic Beverages                                                                                                        | Nutrient of interest no report                               |
| 2017           | Do Brands Serve as Reliable Signals of Nutritional Quality? The Case of Breakfast Cereals                                                                                                       | Nutrient of interest no report                               |
| 2019           | Variations in Sugar Content of Flavored Milks and Yogurts: A Cross-Sectional Study across 3 Countries                                                                                           | No comparison over time                                      |
| 2020           | Sugar Content and Nutritional Quality of Child Orientated Ready to Eat Cereals and Yoghurts in the UK and Latin America; Does Food Policy Matter?                                               | No comparison over time                                      |
| 2020           | The nutritional content of children's breakfast cereals: a cross-sectional analysis of New Zealand, Australia, the UK, Canada and the USA                                                       | No comparison over time                                      |
| 2019           | Tracking kids food: Comparing the nutritional value and marketing appeals of child-targeted supermarket products over time                                                                      | Food category of interest not reported                       |
| 2008           | The National Food and Nutrient Analysis Program: A decade of progress                                                                                                                           | Food category of interest not reported                       |
| 2010           | Nutritional quality and labelling of ready-to-eat breakfast cereals: the contribution of the French observatory of food quality                                                                 | No comparison over time                                      |
| 2014           | A comparative study of the sodium content and calories from sugar in toddler foods sold in low- and high-income New York City supermarkets                                                      | No comparison over time                                      |
| 2007           | Choosing breakfast: how well does packet information on Australian breakfast cereals, bars and drinks reflect recommendations?                                                                  | No comparison over time                                      |
| 2004           | Trans, saturated, and unsaturated fat in foods in the United States prior to mandatory trans-fat labeling                                                                                       | No comparison over time                                      |
| 2018           | UK children's breakfast cereals - an oral health perspective                                                                                                                                    | No comparison over time                                      |
| 2012           | Exploring the landscape of nutrition related marketing in Canada: is it guiding consumers to more healthful dietary patterns?                                                                   | No comparison over time                                      |
| 2022           | Nutritional quality and degree of processing of childrens foods assessment on the french market                                                                                                 | No comparison over time                                      |
| 2021           | Changes in the Use of Non-nutritive Sweeteners in the Chilean Food and Beverage Supply After the Implementation of the Food Labeling and Advertising Law                                        | Nutrient of interest no report                               |
| 2021           | Claims on Ready-to-Eat Cereals: Are Those With Claims Healthier?                                                                                                                                | No comparison over time                                      |
| 2019           | Availability and interpretation of the labeling of dairy products in Montevideo- Uruguay: transversal study on declarations of nutritional properties related to energy and total fats          | No comparison over time                                      |
| 2019           | Nutrient profiling and food prices: what is the cost of choosing healthier products?                                                                                                            | No comparison over time                                      |
| 2014           | Nutritional quality, labelling and promotion of breakfast cereals on the New Zealand market                                                                                                     | No comparison over time                                      |
| 2022           | Nutritional quality of wholegrain cereal-based products sold on the Italian market: data from the FLIP study                                                                                    | No comparison over time                                      |
| 2016           | Investigating nutrient profiling and Health Star Ratings on core dairy products in Australia                                                                                                    | No comparison over time                                      |
| 2017           | The healthfulness and prominence of sugar in child-targeted breakfast cereals in Canada                                                                                                         | No comparison over time                                      |
| 2021           | A Cross-Sectional Audit of Nutrition and Health Claims on Dairy Yoghurts in Supermarkets of the Illawarra Region of New South Wales, Australia                                                  | No comparison over time                                      |
| 2018           | Evaluating the Nutritional Content of Children's Breakfast Cereals in Australia                                                                                                                 | No comparison over time                                      |
| 2019           | An Audit of the Nutrition and Health Claims on Breakfast Cereals in Supermarkets in the Illawarra Region of Australia                                                                           | No comparison over time                                      |
| 2017           | Nutrient Content in Yoghurt: A Comprehensive Survey of the UK Yoghurt Market in Advance of Government Mandated Sugar Reduction and Reformulation                                                | No comparison over time                                      |
| 2017           | Assessment of the construct validity of the Australian Health Star Rating: a nutrient profiling diagnostic accuracy study                                                                       | No comparison over time                                      |
| 2015           | Comparative Performance of NEMS-S Surveys in Latino Corner Stores in the Greater Boston Area                                                                                                    | Analysis at food category level and not nutritional content; |
| 2022           | Encouraging healthier grocery purchases online: A randomised controlled trial and lessons learned                                                                                               | No comparison over time                                      |
| 2009           | Healthy food choices and physical activity opportunities in two contrasting Alabama cities                                                                                                      | No comparison over time                                      |
| 2018           | Child- and adult-orientated breakfast cereals: a cross sectional analysis of nutrient profile                                                                                                   | No comparison over time                                      |
| 2020           | A survey on salt content labeling of the processed food available in Malaysia                                                                                                                   | No comparison over time                                      |
| 2016           | The nutritional quality of foods carrying health-related claims in Germany, The Netherlands, Spain, Slovenia and the United Kingdom                                                             | No comparison over time                                      |
| 2017           | Consumption of ultra-processed foods predicts diet quality in Canada                                                                                                                            | No comparison over time                                      |
| 2017           | Use of Added Sugars Instead of Total Sugars May Improve the Capacity of the Health Star Rating System to Discriminate between Core and Discretionary Foods                                      | No comparison over time                                      |
| 2019           | Does point-of-sale nutrition information improve the nutritional quality of food choices?                                                                                                       | No comparison over time                                      |
| 1997           | Nutrition labelling of sugar-containing foods in 1996 compared with 1989                                                                                                                        | Full publication Unavailable                                 |
| 2021           | Which companies dominate the packaged food supply of New Zealand and how healthy are their products?                                                                                            | No comparison over time                                      |
| 2020           | The holistico-reductionist Siga classification according to the degree of food processing: an evaluation of ultra-processed foods in French supermarkets                                        | No comparison over time                                      |
| 2021           | Fermented foods: availability, cost, ingredients, nutritional content and on-pack claims                                                                                                        | No comparison over time                                      |
| 2018           | Evaluation of the nutrient content of yogurts: a comprehensive survey of yogurt products in the major UK supermarkets                                                                           | No comparison over time                                      |
| 2021           | Evaluating the nutritional quality of UK meat and dairy analogues compared to conventional animal products using multiple nutrient profiling models                                             | No comparison over time                                      |
| 2018           | Evaluating the <10:1 wholegrain criterion in identifying nutrient quality and health implications of UK breads and breakfast cereals                                                            | No comparison over time                                      |
| 2021           | A comparison of four different nutritional profile models in their scoring of critical nutrient levels in food products targeted at Brazilian children                                          | No comparison over time                                      |
| 2021           | Breakfast cereals carrying fibre-related claims: do they have a better nutritional composition than those without such claims? Results from the food labelling of Italian products (FLIP) study | No comparison over time                                      |
| 2009           | Availability of more healthful food alternatives in traditional, convenience, and nontraditional types of food stores in two rural Texas counties                                               | Analysis at food category level and not nutritional content; |
| 2016           | Analysis of critical nutrient levels (sugar, fat, and salt) declared in processed foods marketed in Loja-Ecuador                                                                                | Food category not specified                                  |
| 2013           | Amount of sugar in Australian breakfast cereals is not associated with energy density or glycaemic index: results of a systematic survey                                                        | No comparison over time                                      |
| 2018           | Food reformulation and nutritional quality of food consumption: an analysis based on households panel data in France                                                                            | Nutrient of interest not reported;                           |
| 2019           | Prevalence of child-directed marketing on breakfast cereal packages before and after Chile's food marketing law: a pre- and post-quantitative content analysis                                  | Food category not reported as one group;                     |
| 2021           | Sugars, Salt, Saturated Fat and Fibre Purchased through Packaged Food and Soft Drinks in Europe 2015–2018: Are We Making Progress?                                                              | Study design not cross-sectional                             |
