# Supplementary material for: Reformulation of Processed Yogurt and Breakfast Cereals over Time: A Scoping Review
Source: Int J Environ Res Public Health. 2023 Feb 14;20(4):3322. doi: 10.3390/ijerph20043322 (PMC9964677; doi:10.3390/ijerph20043322)
Supplement: Supplementary file 1 [file ijerph-20-03322-s001.zip › Supplementary Table S3 Axis Quality Appraisal_January 2023.pdf]

Supplementary Table S3. Quality assessment of 13 included studies using Appraisal Tool for Cross-Sectional Studies (AXIS).

| Question                                                                                                                                                | Walker et al. | Louie et al. | Trevena et al. | He et al. | Monro et al. | Arcand et al. | Zganiacz et al. | Chepulis et al. | Kanter et al. | Moore et al. | Vermote et al. | McMenemy et al. | Croisier et al. |
|---------------------------------------------------------------------------------------------------------------------------------------------------------|---------------|--------------|----------------|-----------|--------------|---------------|-----------------|-----------------|---------------|--------------|----------------|-----------------|-----------------|
| Were the aims/objectives of the study clear                                                                                                             | Y             | Y            | Y              | Y         | Y            | Y             | Y               | Y               | Y             | Y            | Y              | Y               | Y               |
| Was the study design appropriate for the stated aim(s)?                                                                                                 | Y             | Y            | Y              | Y         | Y            | Y             | Y               | Y               | Y             | Y            | Y              | Y               | Y               |
| Was the sample size justified?                                                                                                                          | Y             | Y            | Y              | Y         | Y            | Y             | N               | Y               | Y             | Y            | Y              | N               | Y               |
| Was the target/reference population clearly defined? (is it clear who the research was about)                                                           | Y             | Y            | Y              | Y         | Y            | Y             | Y               | Y               | Y             | Y            | Y              | Y               | Y               |
| Was the sample frame taken from an appropriate population base so that it closely represented the target/reference population under investigation?      | Y             | Y            | Y              | Y         | Y            | Y             | N               | Y               | Y             | Y            | Y              | Y               | Y               |
| Was the selection process likely to select subjects/participants that were representative of the target / reference population under investigation?     | Y             | Y            | Y              | Y         | Y            | Y             | N               | Y               | N             | Y            | Y              | Y               | Y               |
| Were measures undertaken to address and categories non responders?                                                                                      | N             | N            | N              | N         | N            | N             | N               | CT              | CT            | N            | N              | N               | o               |
| Were the risk factor and outcome variables measured appropriate to the aims of the study?                                                               | Y             | Y            | Y              | Y         | Y            | Y             | Y               | Y               | Y             | Y            | Y              | Y               | Y               |
| Were the risk factor and outcome variables measured correctly using instruments / measurements that had been trialed, piloted and published previously? | Y             | Y            | Y              | Y         | Y            | Y             | Y               | Y               | Y             | Y            | Y              | Y               | Y               |
| Is it clear what was used to determine statistical significance and / or precision estimates? (e.g. p-values, confidence intervals)                     | Y             | Y            | Y              | N         | Y            | Y             | Y               | Y               | N             | Y            | Y              | N               | Y               |
| Were the methods (including statistical methods) sufficiently described to enable them to be repeated?                                                  | Y             | Y            | Y              | N         | Y            | Y             | Y               | Y               | Y             | Y            | Y              | N               | Y               |
| Were the basic data adequately described?                                                                                                               | Y             | Y            | Y              | Y         | Y            | Y             | Y               | Y               | Y             | Y            | Y              | Y               | Y               |
| Does the response rate raise concerns about non - response bias?                                                                                        | N             | N            | N              | N         | N            | N             | N               | N               | CT            | N            | N              | N               | N               |
| If appropriate, was information about non responders described?                                                                                         | N             | N            | N              | N         | N            | N             | N               | CT              | CT            | CT           | Y              | N               | N               |
| Were the results internally consistent?                                                                                                                 | Y             | Y            | Y              | Y         | Y            | Y             | Y               | Y               | Y             | Y            | Y              | Y               | Y               |
| Were the results presented for all the analyses described in the methods?                                                                               | Y             | Y            | Y              | N         | Y            | Y             | Y               | Y               | Y             | Y            | Y              | Y               | Y               |
| Were the authors' discussions and conclusions justified by the results?                                                                                 | Y             | Y            | Y              | Y         | Y            | Y             | Y               | Y               | Y             | Y            | Y              | Y               | Y               |
| Were the limitations of the study discussed?                                                                                                            | N             | Y            | Y              | N         | Y            | Y             | N               | N               | Y             | Y            | Y              | Y               | Y               |
| Were there any funding sources or conflicts of interest that may affect the authors' interpretations of the results?                                    | N             | CT           | N              | N         | N            | N             | N               | N               | N             | N            | Y              | CT              | N               |
| Was ethical approval or consent of participants attained?                                                                                               | N             | Y            | N              | N         | CT           | CT            | N               | CT              | CT            | N            | CT             | N               | N               |

Y= yes, N = N, CT = Can't Tell
